# Supplementary material
Source: PubMed Central journal article supplement (PMC341914)
Supplement: plntcell_tpc.018952_1.pdf [file plntcell_tpc.018952_1.pdf]

| pSK oligonucleotides                                                                   |                                                         |
|----------------------------------------------------------------------------------------|---------------------------------------------------------|
| T3                                                                                     | 5'-gcaattaaccctcactaaag-3'                              |
| T7                                                                                     | 5'-gtaatacgactcactatagggc-3'                            |
| Specific <i>Mtccs52A</i> oligonucleotides used for construction of deleted forms       |                                                         |
| Cla1                                                                                   | 5'-atcgataaggatcgagaaggtgaggtgtaatgg-3'                 |
| Cla2                                                                                   | 5'-atcgttatcgattatcaatactccgacggaag-3'                  |
| Cla3                                                                                   | 5'-atcgattcatcgcgctcctccgctg-3'                         |
| Cla4                                                                                   | 5'-atcgattaagacggagacgagaca-3'                          |
| ΔpestA                                                                                 | 5'-atggacggaactggcaatcatgtcaaccgtatgatcaacagc-3'        |
| Primer pairs used for mutagenesis                                                      |                                                         |
| PIR-R                                                                                  | 5'-cttgaagaactacttagaggtgattgatcctggcgttcagccc-3'       |
| PIR-L                                                                                  | 5'-gggctgcaacgccaggatcaatcactctaagtagttctccaag-3'       |
| P <sub>12</sub> E_R                                                                    | 5'-cagcaaccattacaccgaacctgaacgaacaatctactccgatggg-3'    |
| P <sub>12</sub> E_L                                                                    | 5'-cccctcggagtagattgttcggttcaggttcggtgtaatggttctg-3'    |
| P <sub>3</sub> E_R                                                                     | 5'-ggatgttgccggtccggtgagccggaaaaaacgactcg-3'            |
| P <sub>3</sub> E_L                                                                     | 5'-cgagtcgggttttccggctcaaccggaccggcaacatcc-3'           |
| P <sub>4</sub> E_R                                                                     | 5'-cctggtgtaataatcatgaaccggtaaggctcctaggaagg-3'         |
| P <sub>4</sub> E_L                                                                     | 5'-cctcctaggagccttaaccggttcatgattaacaccagg-3'           |
| P <sub>5</sub> E_R                                                                     | 5'-gctcctaggaagggtcctcgagagcctataagggtttg-3'            |
| P <sub>5</sub> E_L                                                                     | 5'-ccaaaacctataaggctctcgaggaaaccttctaggagc-3'           |
| P <sub>6</sub> E_R                                                                     | 5'-ggttctggaatgtttccctgagcctaaatcacagaatactgaaagtg-3'   |
| P <sub>6</sub> E_L                                                                     | 5'-cactttcagtattctgtgatttaggctcagggaaaaacattccagaacc-3' |
| P <sub>12</sub> A_R                                                                    | 5'-agcaaccattacaccgcacctgctcgaacaatctactccg-3'          |
| P <sub>12</sub> A_L                                                                    | 5'-tcggagtagattgttcgagcaggtgcggtgtaatggttgc-3'          |
| P <sub>3</sub> A_R                                                                     | 5'-ggatgttgccggtccggttcgcccggaaaaaacgactcg-3'           |
| P <sub>3</sub> A_L                                                                     | 5'-cgagtcgggttttccggcgcaaccggaccggcaacatcc-3'           |
| P <sub>4</sub> A_R                                                                     | 5'-cctggtgtaataatcatgctccggttaaggctcctaggaagg-3'        |
| P <sub>4</sub> A_L                                                                     | 5'-cctcctaggagccttaaccggagcatgattaacaccagg-3'           |
| P <sub>5</sub> A_R                                                                     | 5'-gctcctaggaagggtcctcgagcgcctataagggtttg-3'            |
| P <sub>5</sub> A_L                                                                     | 5'-ccaaaacctataaggcctcgaggaaaccttctaggagc-3'            |
| P <sub>6</sub> A_R                                                                     | 5'-ggaatgtttccctgcccctaaatcacagaatactgaaagtg-3'         |
| P <sub>6</sub> A_L                                                                     | 5'-cactttcagtattctgtgatttagggcagggaaaaacattcc-3'        |
| Specific <i>Mtccs52A</i> and <i>Mtccs52B</i> primers used for construction of chimeras |                                                         |
| NA-L                                                                                   | 5'-cggtcgacaccaggaacaaaatcatcatc-3'                     |
| CB-R                                                                                   | 5'-gggtcgacactcctcctaagcctcta-3'                        |
| NB-L                                                                                   | 5'-cggtcgacaccctattacaaaacctc-3'                        |
| CA-R                                                                                   | 5'-cggtcgaccatagtcgggtaaggctcc-3'                       |
| Oligonucleotides used for RT-PCR and Northern analysis                                 |                                                         |
| p52GL                                                                                  | 5'-ttgggttgctgtgtagaa-3'                                |
| p52-3'end                                                                              | 5'-taatgcaggagagcactat-3'                               |
| c12P1                                                                                  | 5'-gccaccaattgaactctgttg-3'                             |
| c12P2                                                                                  | 5'-caattgtaggttactcgtg-3'                               |
| Msc27-5'                                                                               | 5'-ggaggttgagggaaagtgg-3'                               |
| Msc27-3'                                                                               | 5'-caccaacaagaattgaagg-3'                               |
| Pro4L                                                                                  | 5'-ccttctcaactagctgccgc-3'                              |
| Pro7R                                                                                  | 5'-aattccatccccattgc-3'                                 |

**Table I.** List of oligonucleotides used in this study.
